# Supplementary material for: A virtual clinic for the management of diabetes-type 1: study protocol for a randomised wait-list controlled clinical trial
Source: Springer Nature journal article supplement (doi:10.1186/s12902-020-00615-3), 2020-09-05

Supplementary file 1. Flow chart virtual diabetes clinic with waiting list design

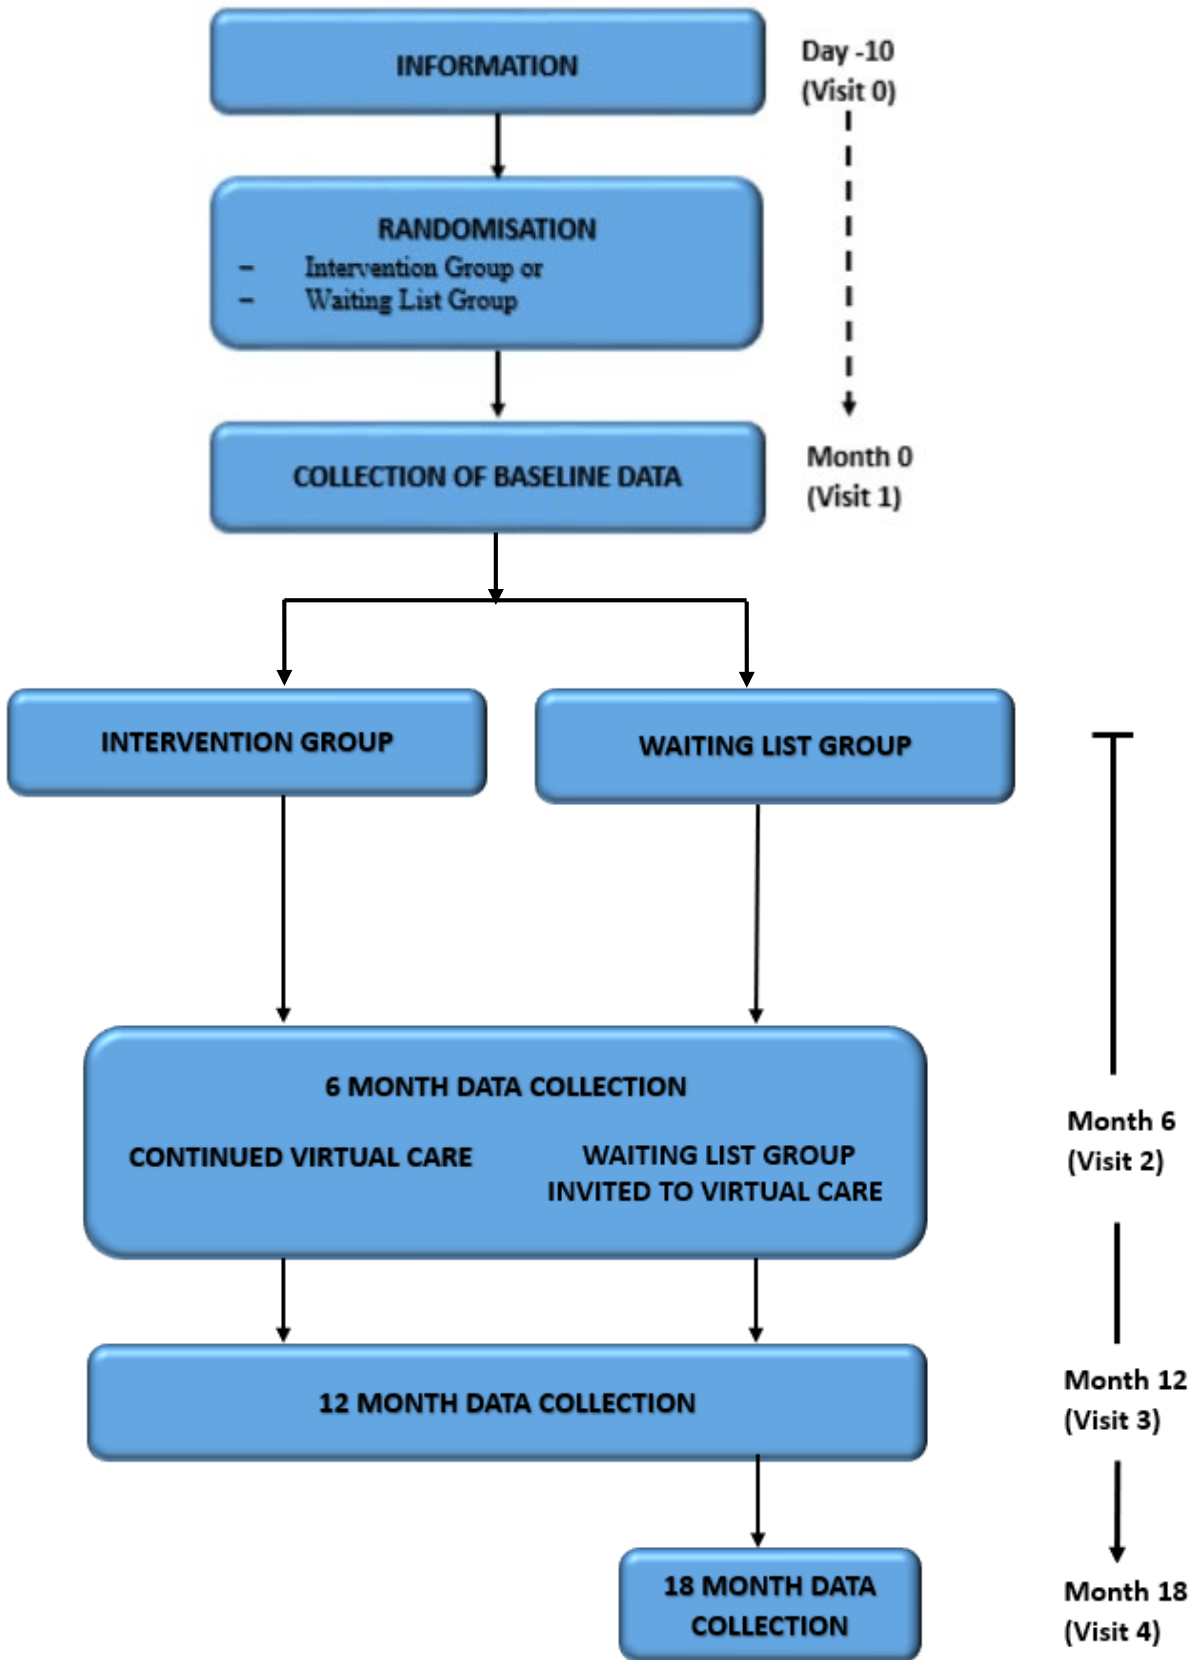

Supplement: MOESM1 [file 18351142]
